# Supplementary material
Source: PubMed Central journal article supplement (PMC1544176)
Supplement: pnas_0602038103_2.pdf [file pnas_0602038103_2.pdf]

AT4G11140.1 -----METEKVSLP-----RILRISVTDPYATDSSSDEEEVDFMDFALSTKRRRVKRYVHEVWDS--VVSDEKPKM-KRKRKRVT-----  
 VPVVVTTAT---- 88  
 AT4G23750.1 -----MEAKKMVLPRIKFTEHKTNTTIVSELTNTHQTRILRISVTDPDATDSSSDEEE-EHQRFVSKRRRVKRFVHEVYLDGSAVVTGSCGQMESKKRQKRAVKSE-----  
 STVSPVVSATTTTTTGE 119  
 AT5G53290.1 --MDEYIDFPLKYTEHKTSMTKYTKKSS--EKLSGGKSLKKVSLCYTDPDATDSSSDEDEE----DFLPFRRVKRFVHEITVEPSCNNV--  
 VTGVSMKDRKRLSSSDDETQSPASSRQRPNKVSVSQ-I 123  
 AT4G27950.1 MMMDEFMDLRPVKYTEHKTVIRKYTKKSSMERKTSVRDSARLVRVSMTRDADTSSSDEEE----FLPFRRVKRLIHEITVEPSSSSTGDVVSASPTKDRKRINVDS-----TVQKP----  
 SVSGQNQ 119  
 AT2G46310.1 ----MKSRLKSKYTVHRKIT---STPPD-----GFPKIVKIVTDPDATDSSSDEE----NDNKSVAPEVKRYVHEITVECD-EDDEPKPARKAKKSP-AAAAEN-----  
 GDDLKVS 101  
 AT3G61630.1 ----MERRTRVKFTENRVTINVAATPSN-----GSPRLVRITVTDPFATDSSSDDDD----NNNVTVVPEVKRYVHEITVECDQGESSSSTAARKGKHEEESVVVED-----  
 DVSTSVKP 107  
  
 \* + + + ## #####++ ###+ +\*#\* \* +\*

AT4G11140.1 RKFRGVRQRPWGKAAEIRDPSRRVRVWLGTFDATAEEAAIVYDAAIQLRGPAELNF-----PPPVTENVEEASTEVEKGVSD----  
 FIIGGECRLRSPSVLSDFSGESTAVKEEFVGVST- 200  
 AT4G23750.1 KKFRGVRQRPWGKAAEIRDPLKRVRLWLGTYNATAEEAAIVYDAAIQLRGPAALTNFSVTPPTTATEKKAPPPSPVKKKKKKNNKSKSVIASSSISRSSSNDCLCSPVSVLSPFA-----  
 VDEFSGISS 252  
 AT5G53290.1 KKFRGVRQRPWGKAAEIRDPEQRRRIWLGTFDATAEEAAIVYDAAIRLRGPAALTNFSIPPQEEEEEE--EPEVIEEKPVIMTPTPTSSSE-STEEDLQHLSSPSVLRHR-----  
 SEE-IQQV 252  
 AT4G27950.1 KKFRGVRQRPWGKAAEIRDPEQRRRIWLGTFDATAEEAAIVYDAAIKLRGPAALTNFTVQP-----EPEVQEQE--QEPESNMSVIS-ESMDSQHLSSPVSVLYQTY-----  
 VSEPIDSL 235  
 AT2G46310.1 VFRGVRQRPWGKAAEIRDPSRRTRWLGTFDATAEEAAIYDAAIRIKGHAQTNFLTTPP-----SPTTEVLPETPVIDLEIVSGCDSARESQISLCSPPVSVLFSHN--  
 DETEYRTEPTTEEQ- 218  
 AT3G61630.1 KKFRGVRQRPWGKAAEIRDPSRRTRWLGTFDATAEEAAIYDAAIHLKGPALTNFLTTPP-----TP-----TPVIDLQIVSACDYGRDSRQSLHSPVSVLFNVN--  
 EETEHEIEAIELSP 216  
  
 #+#####+##### # #+#####+ #####+ ##\*#####\*# ## \* + \* # #####

AT4G11140.1 --AEIVVKKEPSFNG----SDFSAPLFSDDVFGFSTSS-ESFGGLFGDNLF-ADMSFGSGFGFCSG-----SGFSSWHVEHFQDIDGLFGSDPVLTV 287  
 AT4G23750.1 PVAVVVKEPSMTTVSETPDFSAPLFSDDVDFDRSSVDPYLGGLFGEDFTADMCTDMNFGDFG-----SGLSSWHVEHFQDIDGLFGSDPLLAV 343  
 AT5G53290.1 QQPFSKAPPEPGVSNAPWWHTGNTGLGESDPSFPLDTPLDNYENESPPMESLFDQPMQIFCENDIFNDMLFLGGETMNIEDELTSSSIKDMGTFSDPDSLSISDLLVA- 354  
 AT4G27950.1 IKPVKQEFLEPEQEPISWHLGEGNT--NTNDLSPFLDITLDNYENESLFDISLFDQPMSPIQPTENDFNDMLFLFDSN---AEEYSSSEIKELGTFSDPDSLSISDLLV- 335  
 AT2G46310.1 -----NPFPLPDLFRSCDYFDSEITPDPLFLFLFHQSLLPNINNNNTVCDKDTNL-----SDSFLGVIGDES--WDVDFEQDHLDDK- 294  
 AT3G61630.1 ERKSTVIKEEEESSAGLVFPDPYLLPDLSLAGECFWDEHAPDLFLDEETK-LQSTLLPNTEVSKQGENE-----TEDFEFGLIDRESPWVDVDFEDHHSFSD 315  
  
 \* + + \* + \* \*\* \* ###+ \*
