# Supplementary material
Source: PubMed Central journal article supplement (PMC1544176)

DMSO

+ Cytokinin

UV

GFP

UV

GFP

CRF1

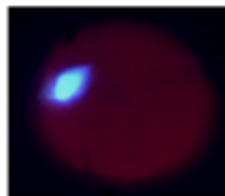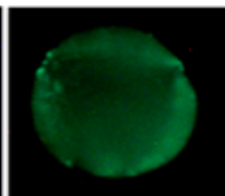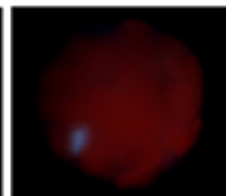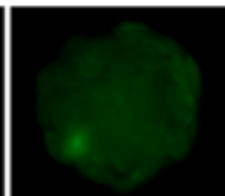

CRF4

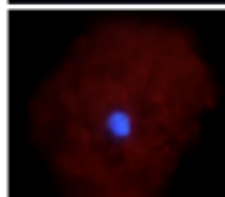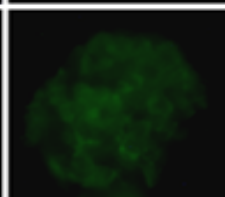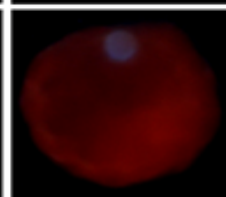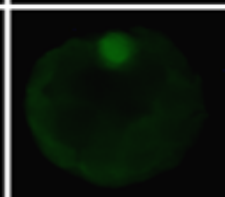

CRF5

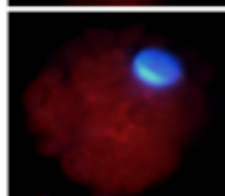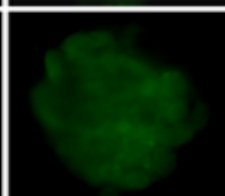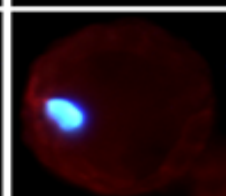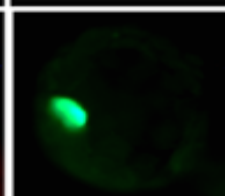

Supplement: pnas_0602038103_3.pdf [file pnas_0602038103_3.pdf]

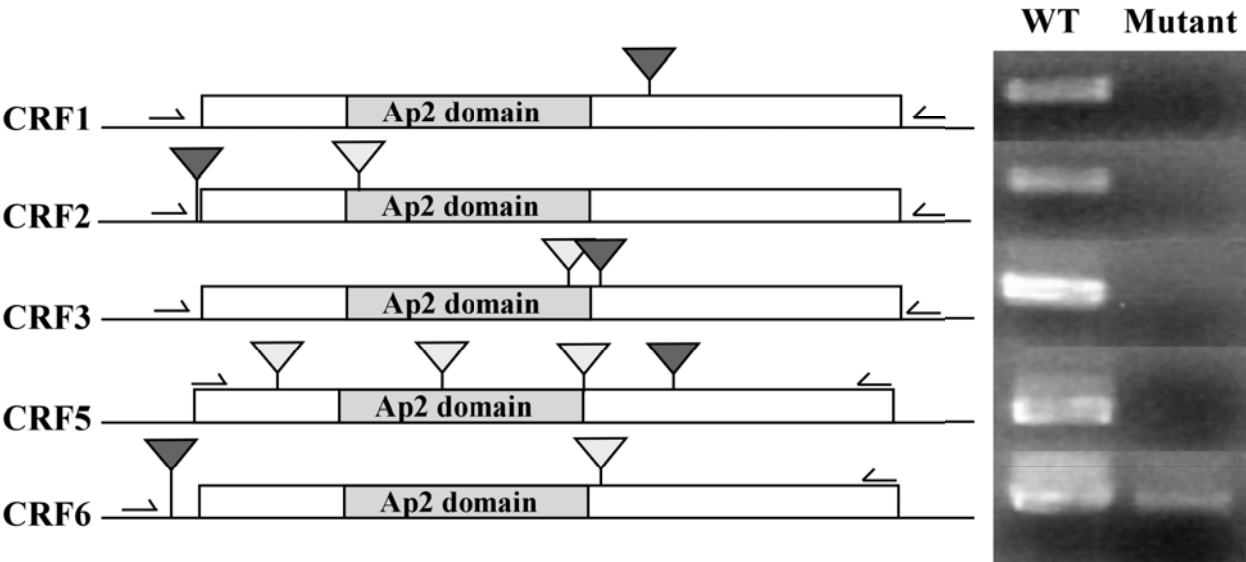

Supplement: pnas_0602038103_4.pdf [file pnas_0602038103_4.pdf]

Root growth day4-9, mm

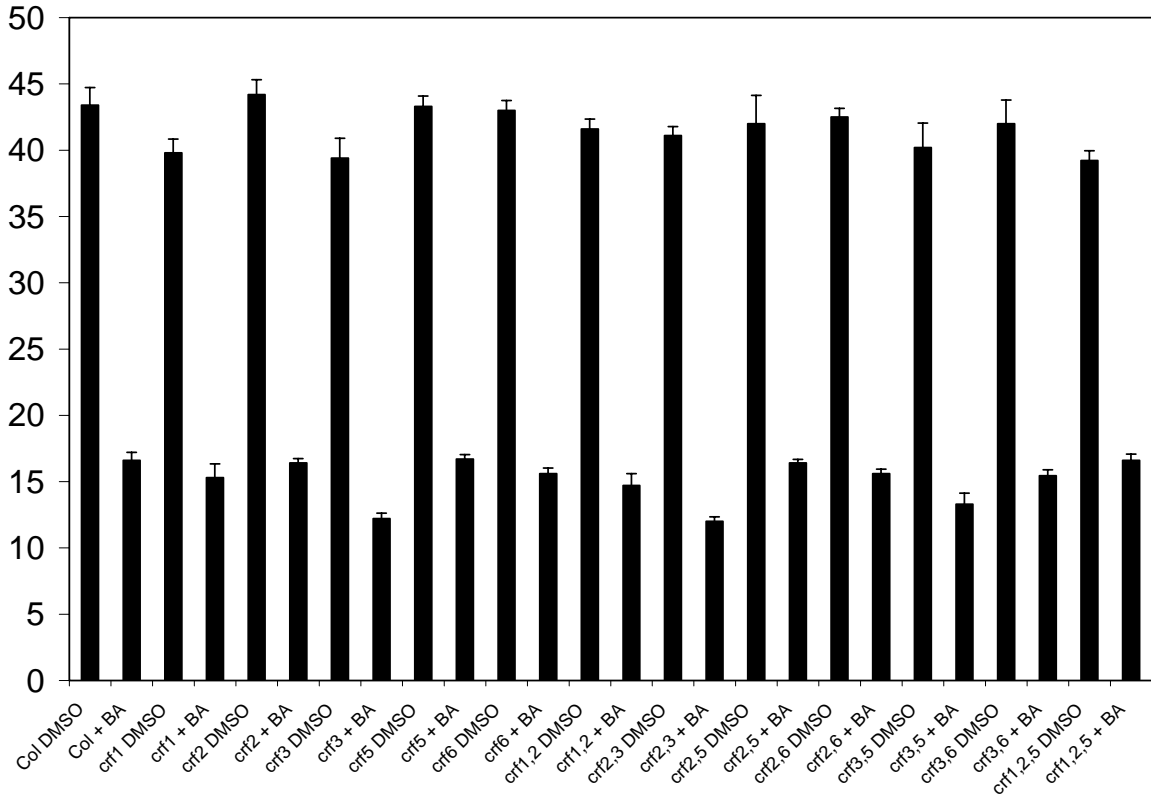

Supplement: pnas_0602038103_5.pdf [file pnas_0602038103_5.pdf]

30ng/ml 2-,4D +  
Kinetin (ng/ml)

0

50

200

1000

Wt (col)

*crf1*

*crf2*

*crf3*

*crf5*

*crf6*

*crf1,2*

*crf2,3*

*crf2,5*

*crf2,6*

*crf3,5*

*crf3,6*

*crf1,2,5*

*crf2,3,6*

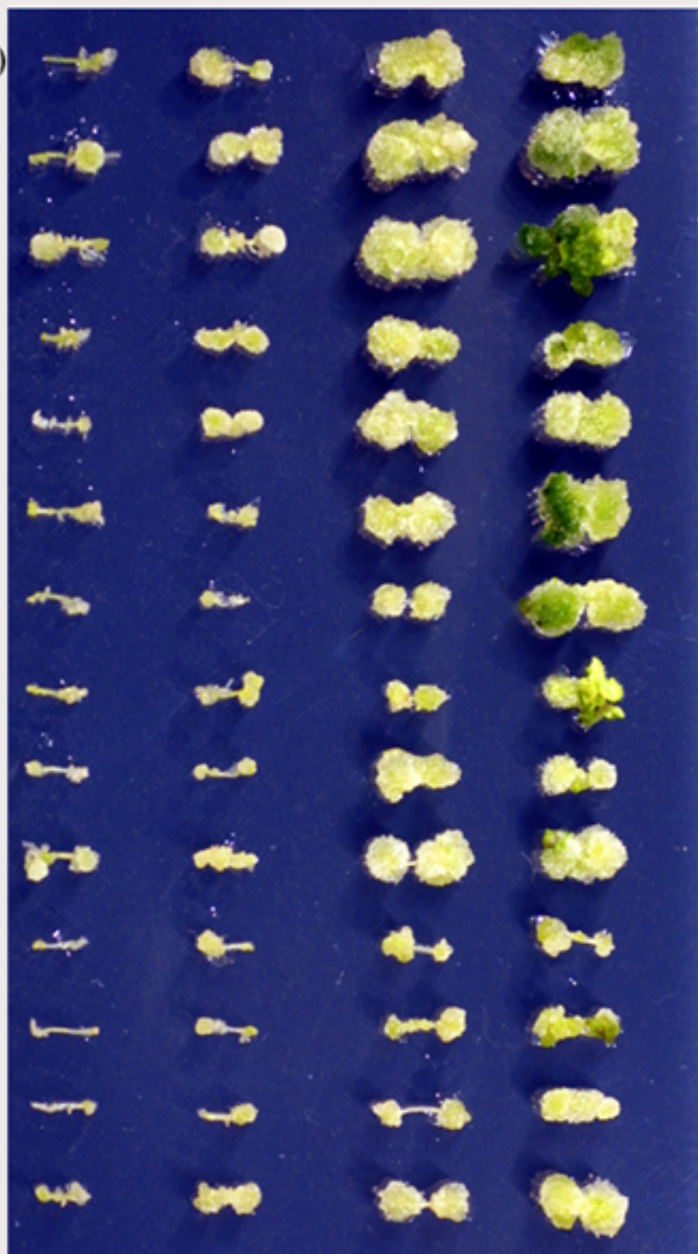

Supplement: pnas_0602038103_6.pdf [file pnas_0602038103_6.pdf]

Relative to WT

WT

*arr1,12*

*crf1,2,5*

*crf2,3,6*

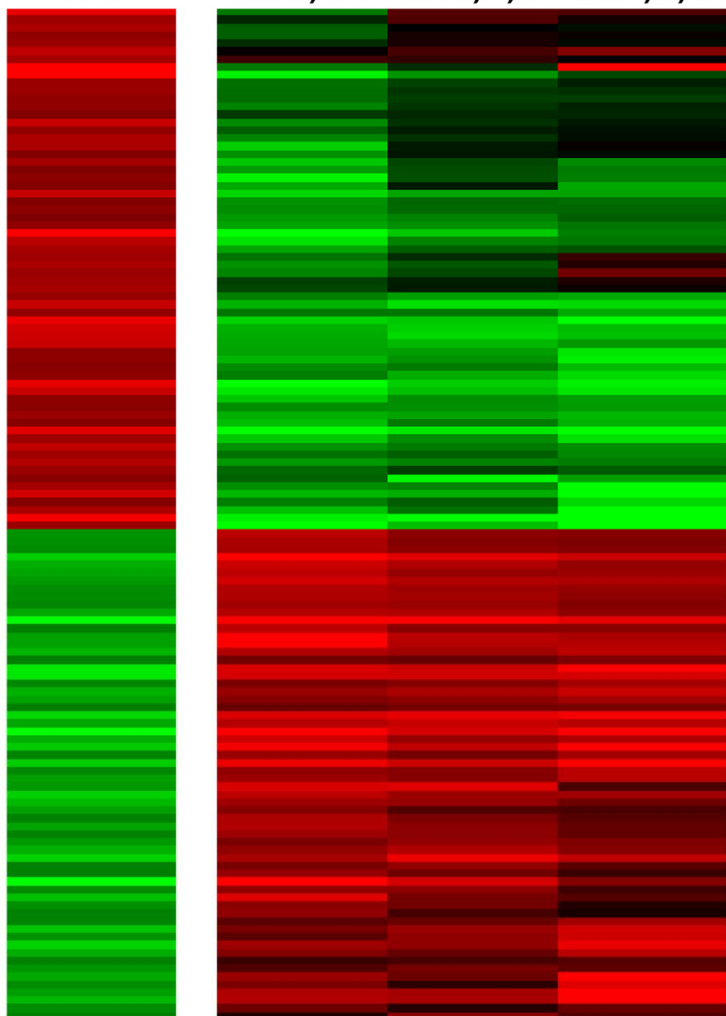

Fold change

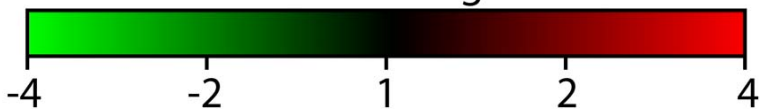

Supplement: pnas_0602038103_7.pdf [file pnas_0602038103_7.pdf]
